# 1    **The payoffs and tradeoffs of hygienic behavior: A large-scale** 2    **field study on a local population of honey bees.**

3    Rya Seltzer<sup>1,2</sup>, Paz Kahanov<sup>1,3</sup>, Yosef Kamer<sup>1</sup>, Amots Hetzroni<sup>1</sup>, Małgorzata  
4    Bieńkowska<sup>4</sup>, Abraham Hefetz<sup>2,5</sup>, and Victoria Soroker<sup>1</sup>.

5

6    <sup>1</sup> Agricultural Research Organization, The Volcani Center, Rishon LeZion, Israel.

7    <sup>2</sup> School of Zoology, George S. Wise Faculty of Life Sciences, Tel Aviv University, Ramat Aviv,  
8    Israel.

9    <sup>3</sup> The Mina and Everard Goodman Faculty of Life Sciences, Bar-Ilan University, Ramat Gan, Israel.

10    <sup>4</sup> Research Institute of Horticulture in Skierniewice, Apiculture Division, 24-100 Pulawy, Poland.

11    <sup>5</sup> Faculty of Marine Sciences, Ruppin Academic Center, Mikhmoret, Israel.

## 12    **Abstract**

13    Honey bees (*Apis mellifera*) are exposed to a variety of risk factors, but the  
14    ectoparasitic mite *Varroa destructor* and its associated viruses are considered to be  
15    the most significant problem worldwide. It has been widely recognized that honey bee  
16    stocks resistant to the mites are an essential part of any sustainable long-term  
17    management of *Varroa*. The aim of this study was to evaluate the efficacy of hygienic  
18    behavior in a local population of honey bees in order to reduce *Varroa* infestation. A  
19    bi-directional selection for high and low rates of hygienic behavior was carried out in  
20    Israel using either queen artificially inseminated or naturally mated. Colonies were  
21    screened for performance: population size, honey production, control of *Varroa*  
22    infestation, and the level of hygienic behavior. Furthermore, we examined the costs  
23    and benefits of selection using measurements of colony performance. Either way,  
24    selected lines should be tested for trade-offs and benefits to ensure their productivity.  
25    The selection process revealed that the trait is heritable. Maternal phenotype has a  
26    significant effect on *Varroa* load, as colonies founded by hygienic daughter queens  
27    showed a significantly lower parasite load. No major trade-offs were found between

28 the rate of hygienic behavior, honey yield, and population size. Measuring the direct  
29 benefits of hygienic behavior through colony performance suggests that breeding for  
30 this trait makes bees more resistant to *Varroa destructor*. These results are promising  
31 for our successful local bee breeding programs in a Mediterranean climate.

32

33 **Keywords: *Apis mellifera*/ breeding/ *Varroa mite*/ integrated pest management/  
34 honey production**

## 35 **Introduction**

36 The Western honey bee, *Apis mellifera*, is the main pollinator of agricultural  
37 crops globally (Delaplane and Mayer 2000; Klein et al. 2007; Dolezal et al. 2016).  
38 Over time, honey bee colonies have been selected for commercially important traits  
39 such as productivity (i.e., honey yields), colony strength, low swarming, and gentle  
40 temperament. High colony losses in the last two decades have raised awareness of  
41 declining honey bee health and scientific efforts to determine and mitigate the causes  
42 of colony loss have been initiated (VanEngelsdorp and Meixner 2010;  
43 [www.coloss.org](http://www.coloss.org)). Although honey bees are exposed to a variety of risk factors,  
44 infestation by the ecto-parasitic mite, *Varroa destructor*, is considered to be the most  
45 significant health problem of *A. mellifera* worldwide (Genersch et al. 2010; Plettner et  
46 al. 2016). The *Varroa* mite is a highly specialized parasite on pupae and adult honey  
47 bees, feeding on their fat body (Ramsey et al. 2019). Beside its direct harm to the  
48 bees, it transmits about 18 different pathogenic viruses that are practically “injected”  
49 into the bees during mite's feeding. (Rosenkranz et al., 2010). These viruses weaken  
50 the bees, and cripple them, as in case of deformed wing virus (DWV) (Francis et al.  
51 2013; Mondet et al. 2014; Zioni et al. 2011), as well as causing immunosuppression

52 (Gregory et al. 2005; Ryabov et al. 2014; Zanni et al. 2017) and learning disabilities  
53 (Rosenkranz et al., 2010). The devastating impact of these viruses is further  
54 synergized by various agrochemicals (Simon-Delso et al. 2014; Steinhauer et al., 2018;  
55 Yang and Cox-Foster 2005).

56 In order to fight this parasite, beekeepers have used a variety of mite control  
57 methods, none of which proved fully satisfactory (Soroker et al., 2018). Moreover, the  
58 extensive use of synthetic acaricides, especially in large beekeeping operations, may  
59 leave residues that are toxic to bees and the consumers of hive products (Mullin et al.  
60 2010). Furthermore, over time the mites develop resistance to all synthetic acaricides  
61 available on the market, which renders its control critical (Sammataro et al. 2005;  
62 Rosenkranz et al. 2010). For example in Israel, following years of successful use of  
63 Fluvalinate and Coumaphos for mite control, their efficacy diminished and these  
64 products are no longer in use (Afik, Ministry of Agriculture Extension Services,  
65 personal communication). As an alternative, local Amitraz-based products are  
66 currently used, but their efficacy against *Varroa* is declining (Zarchi, Ministry of  
67 Agriculture Extension Services, personal communication). This situation necessitates  
68 the development of a sustainable strategy for *Varroa* management that integrates a  
69 number of approaches. Development of mite resistant honey bee stocks is widely  
70 recognized as an essential part of any sustainable integrated *Varroa* management  
71 (Dietemann et al. 2012; Sammataro and Avitabile 2011; Spivak and Gilliam 1998).

72 Social insects, including honey bees, display natural resistance mechanisms  
73 against pests and pathogens, which involve both physiological and behavioral traits  
74 (Evans and Spivak 2010). While *Varroa* infestation typically leads to colony failure  
75 within one to two years (Rosenkranz et al. 2010), some colonies of *Apis mellifera*  
76 from different parts of the world survive without being chemically treated (Büchler et

77 al. 2010). Although the mechanisms leading to such resistance are not entirely clear,  
78 behavioral traits are likely to play a role in these naturally resistant genotypes (Locke  
79 2016). Several stocks of honey bees have been selectively bred for resistance to  
80 *Varroa* by phenotypic selection. The most prominent of these stocks in the USA are  
81 the Minnesota Hygienic Bees (Spivak and Euter 2001), the USDA-bred “Russian”  
82 bees (Rinderer et al. 2001), and the Varroa-Sensitive Hygiene (VSH) stock that was  
83 recently transitioned into the “Pol” line (Danka et al. 2016). Breeding efforts  
84 elsewhere include, but are not limited to, breeding program in Canada (Guarna et al.  
85 2015), selection programs in Germany (Gempe et al. 2016), France (Le Conte et al.  
86 2011) as well as in other countries as recently reviewed by Le Conte et al. (2020).

87 Most of the above programs relied on the improvement of brood-targeted  
88 hygienic behavior, the impact of which has been extensively investigated (Leclercq et  
89 al. 2017). It has been described as a complex behavior involving the detection,  
90 uncapping, and removal of damaged brood (Spivak and Gilliam 1998). In case of  
91 *Varroa* infestation, this behavior apparently interferes with the reproduction of the  
92 mite (Arathi and Spivak 2001; Zakar et al. 2014). Between-generation, comparisons  
93 of hygienic behavior performance demonstrated a significant genetic component for  
94 this behavior (Scannapieco et al. 2017;). In addition, several studies reported that the  
95 value of hygienic behavior heritability is as high as 0.65 (Boecking et al. 2000; Oxley  
96 and Oldroyd 2010).

97 Research that compared performance of local and imported honey bees  
98 indicated that breeding programs should rely on local populations, which are already  
99 adapted to the immediate environment. Such local breeding efforts may prevent  
100 diseases from spreading among populations while preserving global genetic diversity  
101 (Büchler et al. 2014; Meixner et al. 2014; Uzunov et al. 2014). This is a strong

102 argument against the exportation of queens from all over the world. Moreover,  
103 practical success of a local breeding program must take into account possible  
104 tradeoffs with other commercially desired traits, e.g., productivity, colony strength,  
105 and gentle temperament. These may affect acceptance of selected resistant lines by  
106 beekeepers (Uzunov et al. 2017; Leclercq et al. 2017). Trade-offs and benefits  
107 between traits could be the result of pleiotropy, linkage between traits, or a genetic  
108 correlation resulting from the selection on specific individuals which carry several  
109 unrelated traits. While beekeepers often advocate importing superior stocks, a recent  
110 multinational study showed that local stocks display significant advantages over  
111 imported ones (Uzunov et al. 2014; Büchler et al. 2010; Niño and Cameron Jasper  
112 2015, and Uzunov and Brascamp 2017).

113 More than 50 years ago in Israel, the local honey bee race *A. mellifera syriaca*  
114 was actively displaced by *A. mellifera ligustica* that was also mixed over the years  
115 with other races mainly, *A. mellifera caucasica* and Buckfast (Soroker et al. 2018).  
116 However, we believe that over time the majority of the population had gradually  
117 adapted to the local conditions of the region. This environment is characterized by hot  
118 dry summers and cold rainy winters with a tendency towards drought years where the  
119 colony loss occurs mostly in the summer. *Varroa* infestation further exacerbates  
120 summer colony loss in Israel, where a 10-15% loss was recorded in the last decade  
121 due to extreme dry and hot weather conditions (V. Soroker, unpublished data). We  
122 therefore assume that in the Mediterranean region, social immunity against the  
123 *Varroa* mite expressed as hygienic behavior is most crucial when forage is scarce and  
124 the population size is in decline.

125 The aim of this study was to screen the local honey bees in Israel for the level  
126 of hygienic behavior and to evaluate its impact on *Varroa* infestation. While most

127 breeding programs are carried out in Europe and North America (Doke et al. 2015),  
128 our experimental program took place in Israel's Mediterranean climate. In order to  
129 quantify the apicultural costs and the benefits of the trait as well as the commercial  
130 applicability of selected lines under the conditions of obligatory regular chemical  
131 treatment against *Varroa*, we conducted bidirectional selection for high and low  
132 hygienic behavior.

### 133 **Materials & Methods**

134 The study was conducted at the breeding apiary of the Volcani Center, Agricultural  
135 Research Organization (ARO), Israel comprising local bee colonies that had been  
136 previously selected for honey yield. The colonies had not received any queens from  
137 an alien source since 2008. During 2012-2017, we performed a bi-directional  
138 selection program based on queens reared from genetically unrelated colonies that  
139 exhibited high or low hygienic phenotype. All selected colonies, regardless of their  
140 hygienic performance, had honey production that was above average. Each year, six  
141 to ten naturally-mated queens were selected based on their maternal lines (high and  
142 low), according to the rate of hygienic behavior and honey production of their colony.  
143 Ten to 15 colonies were established for each maternal line. In addition, in 2016 and  
144 2017, artificially inseminated queens with sperm from 8-10 drones from either high or  
145 low source colonies were used. The daughters of these queens were naturally mated  
146 and used to establish new colonies that were assessed as described below.

147         The colonies and their subsequent generations in this project were distributed  
148 within the apiary area and were assessed for honey yield, hygienic behavior, and  
149 colony size. Colonies in which the queen superseded were excluded from analyses. In  
150 total, this project included 437 colonies over the years, of which 112 were assessed

151 for *Varroa* infestation (see Table 1). We built a data base containing the pedigree and  
 152 all the hive assessment data including their maternal phenotype (high or low hygienic  
 153 behavior) from 2012-2017. To prevent heavy loss, we treated all the colonies twice a  
 154 year against *Varroa* mite with Amitraz loaded strips (Galbitraz), in accordance with  
 155 guidelines from the Ministry of Agriculture Extension Service, first during July-  
 156 August and the second time during November-December.

157 Table 1: Summary of the types of colonies assessed throughout the study by year, according to  
 158 their maternal lines and mating techniques.

| Year | Maternal phenotype (number of maternal lines)                 | Maternal mating techniques                   | N of colonies tested for honey yield and hygienic behaviour | Seasonal assessments (number per season)               | Varoa assessments                     |
|------|---------------------------------------------------------------|----------------------------------------------|-------------------------------------------------------------|--------------------------------------------------------|---------------------------------------|
| 2012 | general population (14)                                       | naturally-mated                              | 69                                                          | beginning, middle, and end (once a season)             | _____                                 |
| 2013 | general population (9)                                        | naturally-mated                              | 50                                                          | beginning, middle, and end (once a season)             | _____                                 |
| 2014 | general population(1), high (4)and low(2) hygienic behavior   | naturally-mated                              | 73                                                          | beginning, middle, and end (three times in the season) | April until end of July (25 colonies) |
| 2015 | general population (1), high (2)and low (2) hygienic behavior | naturally-mated                              | 98                                                          | beginning, and middle (once a season)                  | April until end of July (16 colonies) |
| 2016 | high (3) and low (2) hygienic behavior                        | naturally-mated and artificially inseminated | 69                                                          | beginning, middle, and end (once a season)             | April until end of July (37 colonies) |
| 2017 | high (4) and low (1) hygienic behavior                        | naturally-mated and artificially inseminated | 73                                                          | beginning (once a season)                              | April until end of July (34 colonies) |

160 Population size and hygienic behavior were evaluated three times a year according to  
161 colony development and seasons. The early season occurs after winter *Varroa*  
162 treatment. In our local conditions, this period is typified in by an exponential increase  
163 in hive population and nectar flow, and takes place during the end of February until  
164 mid-March. The second assessment is referred to as the mid-season, and it occurs just  
165 after the spring honey harvest during May and June. The third assessment is referred  
166 to as the late season, and it takes place following summer honey extraction and prior  
167 to the second *Varroa* treatment during July and August. This period is characterized  
168 by a population decline, which remains at a low level until after rain has fallen and  
169 some flowering has occurred in October. In 2015, hygienic behavior was evaluated  
170 three times in each season, in other words, nine times a year for each colony. This was  
171 performed in order to determine the seasonal effect on hygienic behavior.

172 Population size was estimated by measuring the sealed brood area by counting the  
173 number of decimeters containing pupae in each of the frames, according to Büchler et  
174 al. (2013).

175 Hygienic behavior was measured using the “pin test” involving 100 cells containing  
176 red eye pupae (Spivak and Gilliam 1998) as described in detail in Beebook (Büchler  
177 et al. 2013). This entailed marking 100 cells and piercing them with an entomological  
178 pin #2. The proportion of uncapped and cleaned cells (brood removal) was calculated  
179 by comparing pictures taken immediately after pinning, and 24 hours thereafter. The  
180 proportions of uncapped and cleaned cells per colony was the basis for the bi-  
181 directional selection for high and low hygienic behavior. Selection, however, was  
182 based on uncapping behavior only, which was better distributed within the time frame  
183 of the test. Consistently, extreme colonies were selected to establish the next  
184 generation. Throughout, high hygienic colonies were defined if more than 75%



185 uncapping occurred, and low hygienic colonies were defined if less than 45%  
186 uncapping occurred, of all pinned brood cells after 24 hours in three independent  
187 tests.

188 Honey yield was assessed by weighing honey supers in the spring and summer, while  
189 subtracting ten kilograms, the weight of an empty super.

190 Varroa infestation was measured weekly, during April and July for four out of the six  
191 years of this experiment. In total, we measured infestation in 25 colonies in 2014; 16  
192 colonies in 2015; 37 colonies in 2016; and 34 colonies in 2017, using the method of  
193 free-falling *Varroa* on a bottom tray (Dietemann et al. 2013). These colonies were all  
194 located in one area of the apiary, and they represented similarly high and low hygienic  
195 lines. Hives were placed on a 0.5 x 0.5 cm. screen board floor, and an oiled metal tray  
196 was placed under it to record *Varroa* mites that die and/or fall to the bottom within 24  
197 hours. For each colony, the number of mites caught on the trays after 24 hours served  
198 as a measure of infestation level. The rate of increase in *Varroa* load over time was  
199 estimated and the *Varroa* parasite load (measured as parasite x days) was calculated  
200 based on the area under the curve, as a function of time from the first measurement. In  
201 particular we calculated the value for each adjacent time points based on the formula  
202 for trapeze area (S) calculation, when one of the trapeze bases is *Varroa* number at  
203 time t and the other base is its value at t+1, while the height of the trapeze is the time  
204 between the measurements in days. We subsequently summed all the S values to  
205 calculate the *Varroa* load over the entire period.

206 Statistical analysis was performed on seasonal and annual measurements of several  
207 dependent variables for the same colony. These measurements were taken throughout  
208 the year and analyzed in a compatible model. We analyzed how the selection process  
209 affected hygienic behavior of the progeny using a three-way ANOVA with repeated

210 measurements. For this, we took into consideration the following variables: maternal  
211 mating type, maternal phenotype, assessment season, and all their interactions. The  
212 variables were: seasonal measurements of hygienic behavior (proportions of  
213 uncapping and cleaning) and colony size (sealed brood area). The fixed effects  
214 analyzed were mating type, maternal phenotype, assessment season and all their  
215 interactions. Random effects were year of testing and colony number nested within  
216 mating type and maternal phenotype. Significant main effects were examined by the  
217 Tukey HSD test. A two-way ANOVA model was applied for annual measurements of  
218 spring, summer, annual honey yield, and *Varroa* infestation. The fixed effects that  
219 were analyzed were maternal phenotype, year of testing and their interactions.  
220 Pairwise association between hygienic behavior (uncapping and cleaning) and honey  
221 yield were tested by Pearson Correlation. Significance was set at  $\alpha=0.05$ . All  
222 statistical tests were carried out using the JMP 14 Statistical Program (SAS, USA).

## 223 Results

224 We tested the relationship between uncapping and cleaning behaviors. Figure  
225 1 represents the data assembled over the five years of the study. We found a  
226 significant and highly positive correlation between the two components of hygienic  
227 behavior: uncapping and cleaning (Pearson,  $r = 0.87$ ,  $p < 0.0001$ ). Still, the very high  
228 rate of uncapping was not always followed by the high rate of cleaning.

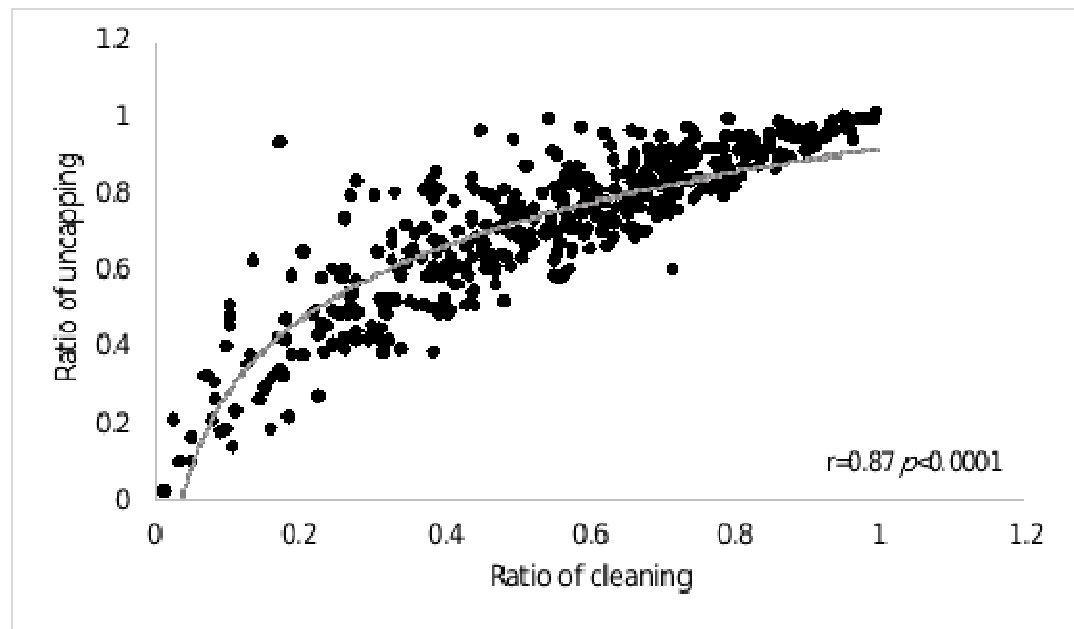

229  
230 Fig. 1: The correlation between the rates of uncapping and cleaning behavior along the tested  
231 years. Each dot indicates a hygienic test, and  $r$  and  $p$  are values of Pearson correlation.

232  
233 Colony size as assessed by sealed-brood area was affected by the maternal  
234 phenotype ( $F_{(1,4)} = 4.4$ ,  $p = 0.03$ ). Progeny of low hygienic colonies had more sealed  
235 brood on average ( $39.4 \pm 5.3$  dm ( $\pm$ SE)) than progeny of high hygienic colonies ( $36.6 \pm$   
236  $5.2$  dm ( $\pm$ SE)). Maternal mating type did not have a significant effect on sealed-brood  
237 area ( $F_{(1,14)} = 0.09$ ,  $p = 0.75$ ).

238 However, as expected, there was a significant effect of seasonality on colony  
239 population size ( $F_{(2,662)} = 559$ ,  $p < 0.0001$ , Fig. 2). In early season the average sealed  
240 brood area was  $46 \pm 3.6$  dm ( $\pm$  SE); in mid-season it was almost the same with an

241 average of  $47.2 \pm 3.7$  dm ( $\pm$  SE); in late season, however, it dropped significantly to  
242 an average  $24.5 \pm 3.7$  dm ( $\pm$  SE). Despite these seasonal fluctuations in population  
243 size, we found no significant effect of seasonality on uncapping: ( $F_{(2,836)} = 1, p = 0.34,$   
244 Fig.2). Cleaning behavior was significantly higher in mid-season ( $0.57 \pm 0.03$  ( $\pm$  SE))  
245 compared to late season ( $0.52 \pm 0.03$  ( $\pm$  SE)) ( $F_{(2,836)} = 1.05, p = 0.01,$  Fig.2).

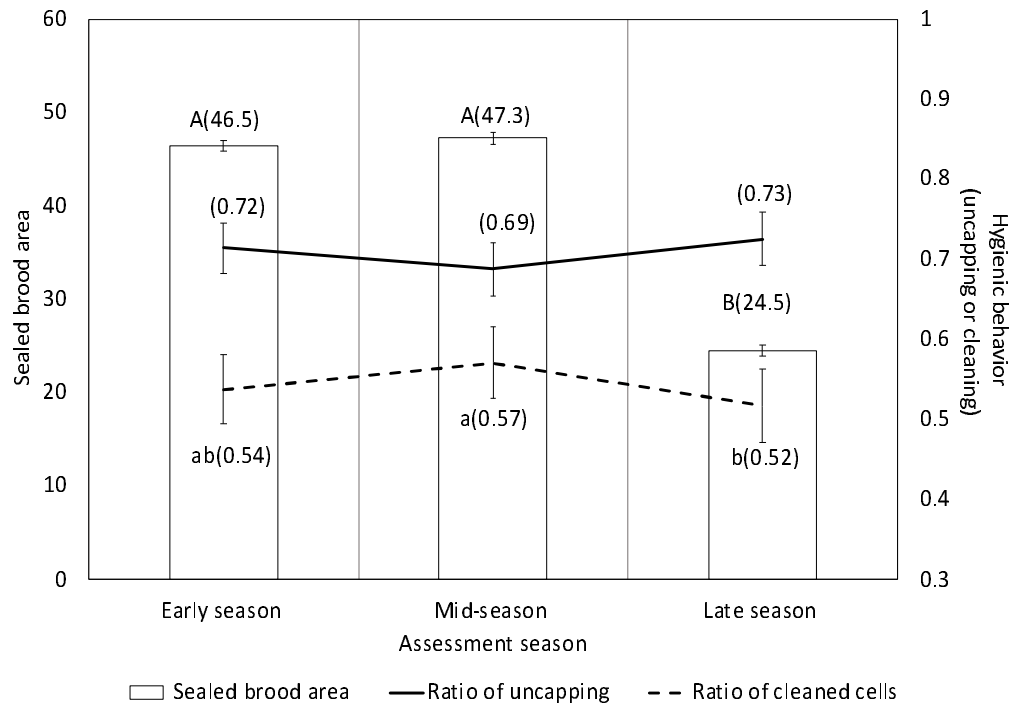

246

247 Fig. 2: Seasonal changes in sealed brood area and in rate of hygienic behavior. The bars represent  
248 sealed brood area (average  $\pm$ SE) and lines represent hygienic behavior: proportion of uncapping  
249 (solid line) or cleaning (dashed line) at different times of the year. The values of average rate of  
250 seasonal performances are presented in parentheses. The x-axis represents time of assessment  
251 relative to the honeybee season: early season, mid-season, and late season. Significant  
252 differences between the seasonal measurements (population size and hygienic behavior) are  
253 labeled by different letters (post-hoc Tukey's HSD,  $p < 0.05$ ). The average seasonal performance is  
254 presented in parentheses.

255

256 The selection according to the maternal phenotype was successful (Table 2).

257 Throughout the duration of the research, the high hygienic progeny colonies had

258 significantly higher levels of both uncapping and cleaning behaviors compared to the

259 low hygienic progeny colonies (high and low respectively, for uncapping  $0.8 \pm 0.01$  vs.  
260  $0.6 \pm 0.01$  (mean  $\pm$ SE)  $p < 0.0001$ , and for cleaning  $0.6 \pm 0.03$  and  $0.4 \pm 0.03$  (mean  $\pm$ SE)

|  | Response |
|--|----------|
|--|----------|

261  $p = < 0.0001$ ). The maternal mating type had a significant effect on the cleaning  
262 behavior, but not on the uncapping behavior (Table 2). In progeny that were tested for  
263 two generations, there was a significant interaction between the maternal phenotype  
264 and mating type for both uncapping and cleaning (Table 2), accentuating the  
265 differences between the high and low selection lines. Progeny of high hygienic queens  
266 that were artificially inseminated had average uncapping behavior of  $0.75 \pm 0.04$  and  
267 average cleaning behavior of  $0.59 \pm 0.04$ . By comparison, progeny of low hygienic  
268 queens that were artificially inseminated had an average uncapping behavior of  
269  $0.4 \pm 0.03$  and average cleaning behavior of  $0.26 \pm 0.04$ . On the other hand, for the  
270 progeny of the naturally-mated queens, the difference between the two phenotypes  
271 were more moderate. Progeny of the naturally-mated high hygienic queens had an  
272 average of uncapping and cleaning behaviors of  $0.77 \pm 0.04$  of  $0.62 \pm 0.02$ , respectively.  
273 Progeny of naturally-mated low hygienic queens seem to have lost their low parental  
274 phenotype and showed an average of  $0.70 \pm 0.03$  and  $0.55 \pm 0.02$  uncapping and  
275 cleaning behaviors, respectively. Regarding the random variables, colony identity  
276 was the only parameter that was significant in our model (uncapping:  $F_{(261,477)} = 2.66$ ,  
277  $p < 0.0001$  and cleaning:  $F_{(261,477)} = 2.2$ ,  $p < 0.0001$  (Table 2)).  
278

| Variables                                 | Proportion of uncapped cells             | Proportion of cleaned cells             |
|-------------------------------------------|------------------------------------------|-----------------------------------------|
| Maternal phenotype                        | $F_{(1,7)}=35$ ,<br>$p < 0.0001^*$       | $F_{(1,7)}=36$ ,<br>$p < 0.0001^*$      |
| Maternal mating type                      | $F_{(1,7)}=35$ ,<br>$p = 0.95$           | $F_{(1,16)}=5$ ,<br>$p = 0.02^*$        |
| Maternal phenotype x Maternal mating type | $F_{(1,7)}=5.8$ ,<br>$p < 0.0001^*$      | $F_{(1,7)}=8.8$ ,<br>$p = 0.003^*$      |
| Colony (Random)                           | $F_{(261,477)}=2.66$ ,<br>$p = 0.0001^*$ | $F_{(261,477)}=2.2$ ,<br>$p < 0.0001^*$ |
| Year (Random)                             | $F_{(3,14)}=1.37$ ,<br>$p = 0.29$        | $F_{(3,17)}=2.18$ ,<br>$p = 0.12$       |

279 Table 2: The effect of maternal phenotype (high or low hygienic behavior), maternal mating type  
 280 (naturally-mated or artificially inseminated), and the interaction among them on hygienic  
 281 parameters (cell uncapping and cell cleaning). Significant differences in two-way ANOVA among  
 282 tested groups are marked by an asterisk (colony identity and the year of measurement were taken  
 283 into consideration in our model as random effects).  
 284

285 *Varroa* infestation: The parasite seasonal load was assessed using the *Varroa-*  
 286 *days* formula, which calculates the level of infestation throughout the tested period.  
 287 Maternal phenotype had a significant effect on parasite load ( $F_{(1,120)}=123$ ,  $p =$   
 288  $0.0007$ ). We found the value of this variable to be significantly lower in high hygienic  
 289 colonies derived from a high hygienic maternal source ( $1305 \pm 283$ ) compared to the  
 290 low hygienic colonies ( $2858 \pm 275$ ). The year of testing had also a significant effect  
 291 on *Varroa* infestation ( $F_{(3,120)}=23.4$ ,  $p < 0.0001$ ). The extreme fluctuation in *Varroa*  
 292 infestation was exemplified between the years 2016 and 2015. In 2016, we had the  
 293 lowest *Varroa* infestation, with an average of  $477 \pm 333$  per colony. Conversely, the  
 294 maximum infestation was measured in 2015, with an average of  $5005 \pm 453$ .

295 The interaction between maternal phenotype and the year was also found to be  
296 significant ( $F_{(3,120)}=2.7$ ,  $p = 0.047$ ). We found that in the years with heavy *Varroa*

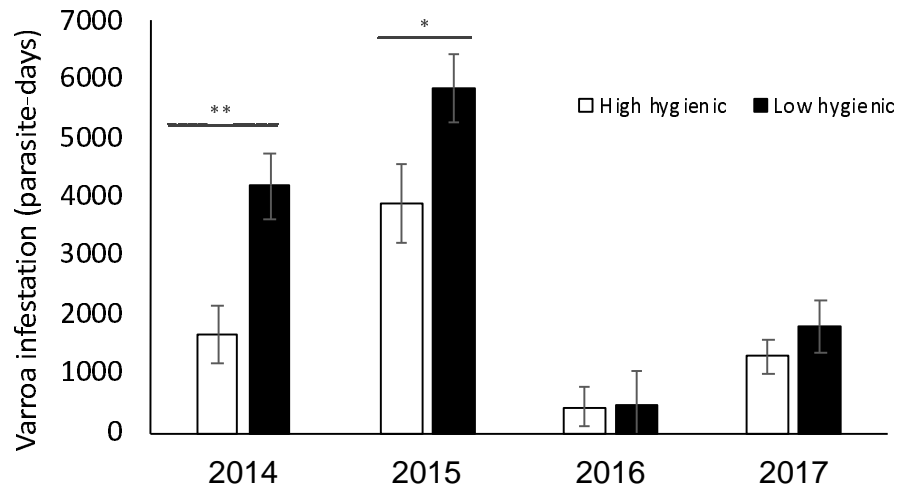

297 infestation, maternal phenotype had a significant effect (in 2014,  $F_{(1,120)}=11.4$ ,  $p =$   
298 0.001 and in 2015,  $F_{(1,120)}=4.6$ ,  $p = 0.033$ , Fig. 3). Obviously in years with low  
299 *Varroa* infestation, the secondary effect of maternal phenotype did not have a  
300 significant impact on the parasite load (in 2016,  $F_{(1,120)}=0.0031$ ,  $p = 0.95$  and in  
301 2017,  $F_{(1,120)}=0.9$ ,  $p = 0.34$ , Fig. 3).

302 Fig 3: Differences in *Varroa* infestation between high and low hygienic maternal lines during four  
303 years of testing. *Varroa* infestation is presented in high hygienic (white bar) and low hygienic  
304 (black bar) progeny. The data are: average  $\pm$  SE. The asterisks indicate significant differences in  
305 *Varroa* load between the two groups (post-hoc Tukey's HSD,  $p < 0.05$ ).

306

307 Honey production: A two-way ANOVA analysis of honey yield was  
308 performed in order to determine the benefits and identify possible tradeoffs of the  
309 selected lines. No significant effect of maternal phenotype was found on honey yields  
310 in both seasons (Table 3). In particular, spring honey yields averaged  $\pm$  SE: 21.3  
311  $\pm 3.6$  kg for high hygienic maternal lines and 21.5  $\pm 3.6$  kg for low hygienic lines;  
312 summer honey yields averaged: 14.4  $\pm 2.3$  kg for high hygienic maternal lines and

313 13.8±2.3 kg for low hygienic lines. Annual honey yields averaged 35.2±3.5 kg for  
 314 high hygienic maternal lines and 34.6±3.5 kg for low hygienic lines. Maternal mating  
 315 type also had no significant effect on honey yields in both seasons (Table 3). For  
 316 spring honey yields, artificially inseminated queens' progeny had on average, 22±3.8  
 317 kg while progeny of naturally mated queens had on average 20.8 ±3.5 kg. For summer  
 318 honey yields, artificially inseminated queens' progeny had 13.8±2.8 kg while progeny  
 319 of naturally mated queens had 14.4±2 kg (Table 3). For annual honey yields  
 320 artificially inseminated queens' progeny had on average 35.5±4 kg and naturally  
 321 mated queens' progeny had 34.3±3 kg ( $F_{(1,11)}=0.2$ ,  $p=0.8$  (Table 3). We found that the  
 322 year of testing (taken into consideration as a random effect) had a significant effect on  
 323 honey yield. This is a well-known phenomenon which is mainly explained by the  
 324 differences in environmental conditions between years.

325 Table 3: The effects of maternal phenotype type (high or low hygienic behavior) and maternal  
 326 mating type (naturally-mated or artificially inseminated), and their interaction on honey yields.  
 327 Significant differences in two-way ANOVA between tested groups are marked with an asterisk.  
 328 The years of measurement were considered as random effects.

| Variables                                 | Response                         |                                |                                 |
|-------------------------------------------|----------------------------------|--------------------------------|---------------------------------|
|                                           | Spring honey yield               | Summer honey yield             | Annual honey yield              |
| Maternal phenotype                        | $F_{(1,4)}=0.01$ ,<br>$p=0.9$    | $F_{(1,4)}=1.4$ ,<br>$p=0.22$  | $F_{(1,5)}=0.2$ ,<br>$p=0.75$   |
| Maternal mating type                      | $F_{(1,14)}=0.004$ ,<br>$p=0.52$ | $F_{(1,9)}=0.34$ ,<br>$p=0.54$ | $F_{(1,11)}=0.24$ ,<br>$p=0.62$ |
| Maternal phenotype x Maternal mating type | $F_{(1,4)}=1.2$ ,<br>$p=0.26$    | $F_{(1,4)}=0.2$ ,<br>$p=0.63$  | $F_{(1,5)}=0.8$ ,<br>$p=0.35$   |
| Year (Random)                             | $F_{(2,1.9)}=27$ ,<br>$p=0.04^*$ | $F_{(2,3)}=11$ ,<br>$p=0.03^*$ | $F_{(2,3)}=5.2$ ,<br>$p=0.09$   |

329  
 330 In general, the maternal phenotype, mating technique, and the interaction  
 331 between them did not have a significant effect on honey yield or on the sealed brood  
 332 area (Tables 2 and 3). A very low but nonetheless significant negative correlation  
 333 between uncapping and spring honey yields, was found (Fig. 4A: Pearson,  $r = -0.137$ ,



334  $p = 0.0093$ ), but practically no correlation regarding cell cleaning (Fig 4B:  $r = -0.09$ ,  $p$   
335  $= 0.07$ ). In contrast, there was a low but positive and significant correlation between  
336 summer yields and both measurements of hygienic behavior (Fig. 4C:  $r = 0.172$ ,  $p$   
337  $= 0.003$ ; and Fig. 4D:  $r = 0.147$   $p = 0.0061$ ). Overall, there was no correlation between  
338 the annual yield (sum of spring and summer yields) and hygienic behavior (Fig 4E:  $r$   
339  $= -0.014$   $p = 0.78$  and Fig. 4F:  $r = 0.008$   $p = 0.87$ ). Taking all of this into consideration,  
340 we believe that the correlation was significant, mainly due to a large sample size. This  
341 is evident in the pattern of scattered points around the line.

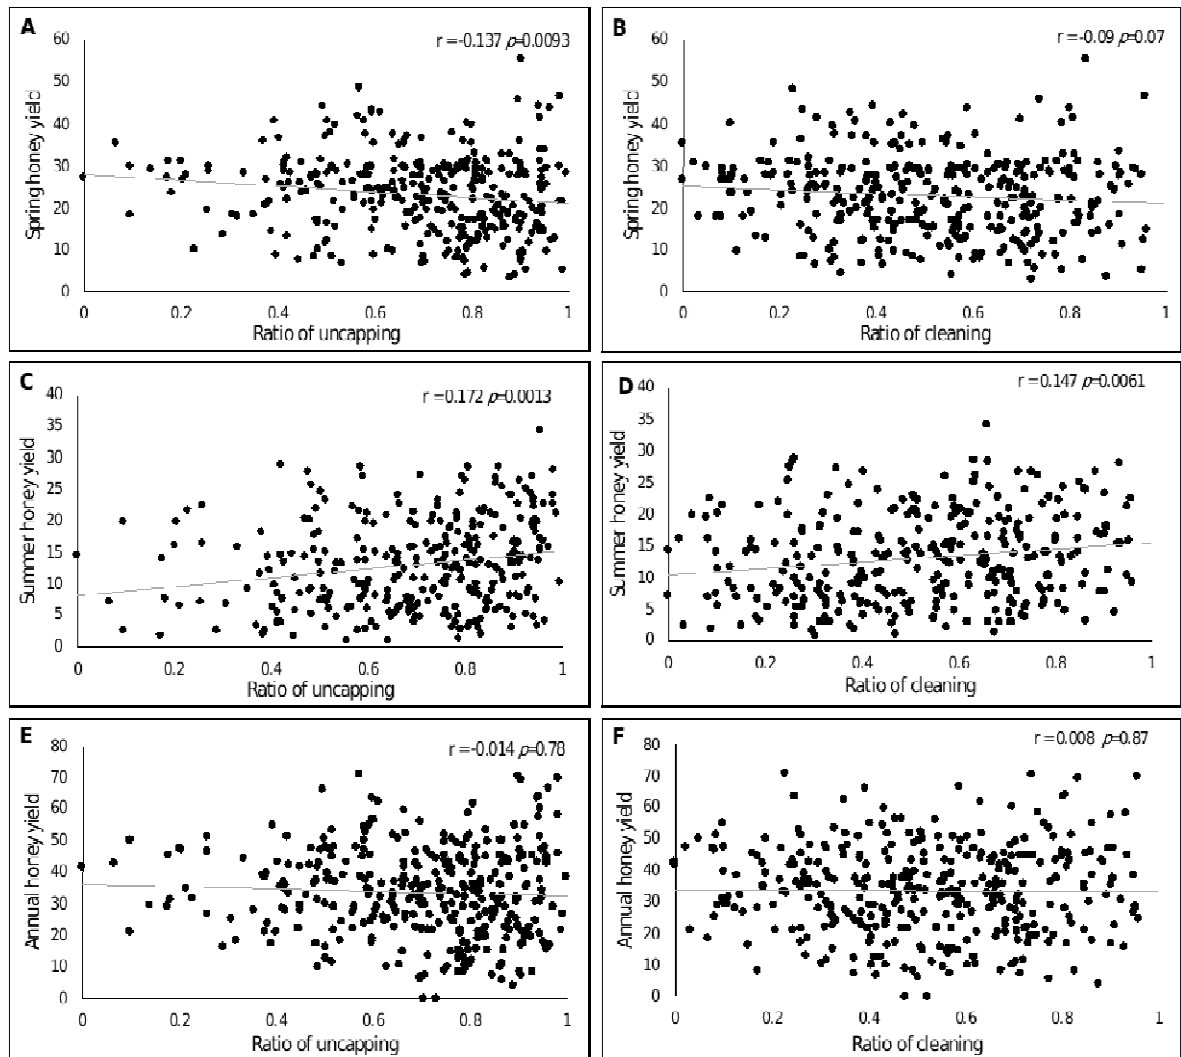

342  
343 Fig 4: Correlations between uncapping and cleaning of pin damaged brood and colony honey  
344 production. Each point represents a different colony. Axis X represents rate of hygienic behavior  
345 (proportion of uncapped or cleaned brood cells) and the Y axis represents honey yield in kg.

346 Spring honey yields (A and B), Summer honey yields (C and D) and Annual honey yields (E and  
347 F) are shown in the figures. The Pearson correlation is represented by  $r$  and  $p$  values.

## 348 **Discussion**

349           Advanced and sustainable management of *Varroa* infestation must include the  
350 selection of honeybee lines that show some degree of resistance to the parasite. Here,  
351 we evaluated the feasibility of breeding for hygienic behavior as part of *Varroa*  
352 management strategy. Our breeding program is unique in that it was carried out in a  
353 Mediterranean climate, where colony loss occurs primarily in the summer as opposed  
354 to colder regions, where it is most common in winter (Doke et al. 2015). It is well  
355 known that there is huge variability in climatic zones and diverse habitats in which  
356 honey bees are found. Therefore, we based our hygienic selection on bees that were  
357 already adapted to local environmental conditions. This approach supports the  
358 preservation of locally-adapted honey bees (Costa et al. 2012; Uzunov et al. 2014).  
359 First, we examined the characteristics of hygienic behavior in our study population,  
360 namely uncapping and cleaning. As expected, in our study, these hygienic associated  
361 behaviors were strongly correlated. Although it is clear that cleaning behavior  
362 depends on uncapping, the two together are a prerequisite for successful pest and  
363 pathogen control including *Varroa* (Spivak and Danka 2021). Next, we analyzed  
364 seasonal effects on hygienic behavior. Seasonality is linked to environmental changes  
365 (e.g., temperature, humidity and precipitation), and thus leads to dramatic fluctuations  
366 in honey bee population size. The sealed brood area is an indicator of population size,  
367 and as a result, it also represents the number of bees at the age of performing hygienic  
368 behavior. Some previous studies have suggested an association between the rate of  
369 hygienic behavior and seasonal fluctuation in colony size (Uzunov et al. 2014), as  
370 well as environmental factors that affect hygienic behavior (Güler and Toy 2013). In

371 contrast, both our results and those of Bigio et al. (2013) demonstrate that hygienic  
372 behavior is rather stable along the season and is independent of the population size.  
373 We found that in our conditions hygienic behavior is rather stable along the season  
374 and fluctuates very little in comparison to the dramatic fluctuations of population size  
375 between the seasons.

376 In agreement with previous research (e.g., Spivak and Reuter 1998; Fly et al.  
377 2014; Zakour and Bienefeld 2014; Danka et al. 2016; de Jesus et al. 2017;  
378 Scannapieco et al. 2017), we have found that maternal colony phenotype has a  
379 significant effect on hygienic behavior, which emphasizes the potential of breeding  
380 for this trait in the local population. We also found a significant interaction between  
381 maternal phenotype and mating technique, indicating that artificially inseminated  
382 daughters preserve the maternal phenotype better than daughters of naturally-mated  
383 daughter queens. This contradicts Bigio et al. (2014a), who claim that there are no  
384 advantages in using artificially inseminated queens while breeding for hygienic  
385 behavior. Our results indicate that selection based solely on queens is not enough. In  
386 fact, the model published by Plate et al. (2019) that simulated the power of selection  
387 in a drone controlled set-up, clearly shows that the selection based solely on queens in  
388 a large non-selected population is insufficient.

389 Although pin-killed assays for hygienic behavior is not specific to *Varroa*  
390 infected brood (Spivak and Danka 2021) and it is preferable to test such resistance  
391 directly by challenging colonies with a parasite, our results clearly showed that lines  
392 derived from a high hygienic maternal source, based on pin killed brood assay, also  
393 demonstrated a lower parasite load when compared to low hygienic progeny colonies.  
394 Moreover, lower loads of *Varroa* mites could result in lower virus infestation (Locke  
395 2012; Kuster et al. 2014; Mondet et al. 2014), which most likely leads to lower virus

396 transmission and improved colony health. Nevertheless, this notion has been  
397 questioned by Geffre et al. (2020) as viruses can alter honeybee social behavior. Since  
398 this behavior increases contact between the workers and infected brood, the  
399 implication of hygienic behavior on viral transmission within and between the  
400 colonies as well as the association between *Varroa* infestation, viral load, and social  
401 and individual immunity remain to be thoroughly investigated.

402       Lastly, the feasibility of implementation of honey bees' hygienic lines in a  
403 commercial apiary is tightly linked to the apicultural costs maintaining such lines and  
404 whether selection for hygienic trait compromises other desired traits. Seeley (1985)  
405 raised a concern about a high cost for hygienic behavior due to the inadvertent  
406 removal of healthy brood from the colony. In fact, in our study we found that progeny  
407 of low hygienic colonies had more sealed brood, but this could suggest that colonies  
408 kept the unhealthy brood rather than the hygienic colonies unintentionally removed  
409 the healthy brood. Unfortunately, in our experiments we have not compared the brood  
410 quality between the genotypes to test this hypothesis and it should be tested in the  
411 future studies. Anyhow, several studies have already shown that hygienic behavior is  
412 specifically directed towards damaged brood (Bigio et al. 2014b; Mondet et al. 2016).  
413 Potential payoffs and tradeoffs of hygienic behavior with respect to honey yield,  
414 propolis production, royal jelly, aggressive behavior, and swarming tendency were  
415 reviewed in Leclercq et al. (2017). They concluded that there were no major tradeoffs  
416 associated with hygienic behavior. Yet every local breeding program should test the  
417 payoffs and tradeoffs of their selected lines, since the latter could carry undesired  
418 additional traits. Our analyses of selected lines revealed no impact on annual honey  
419 yield or population size except for a small significant negative correlation with  
420 uncapping behavior and spring honey yield. There may, however, be a benefit to the

421 trait, supported by the positive correlation between summer honey yield and hygienic  
422 performance. The advantage of high hygienic lines was reflected in the strength of the  
423 colony during the summer peak of *Varroa* infestation. We hypothesize that this trend  
424 would be of great importance due to the ever-growing abundance of acaricide  
425 resistant mites in intensive commercial beekeeping.

426 In conclusion, our results show that not only the hygienic trait exists in a local  
427 population bred for years for honey production, but that selection for this trait reduced  
428 *Varroa* infestation without negative impacts on colony size and honey production.  
429 Therefore, it is safe to recommend its introduction into local breeding programs as a  
430 basis for future integrated *Varroa* management. Moreover, since the literature  
431 demonstrates that hygienic behavior is efficient against several bee diseases, such as  
432 American foulbrood and chalkbrood (Spivak and Reuter 2001; Leclercq et al. 2017),  
433 it will be interesting to test the impact of our selection program on the management of  
434 these two diseases in a Mediterranean climate, as well as on the spread of other bee  
435 viral diseases.

#### 436 **Authors' Contribution**

437 RS, AHefetz and VS designed the experiments. RS, PK, YK, and VS performed the  
438 experiments. MB performed and instructed the process of artificial insemination. A  
439 Hetzroni constructed the database, and RS analyzed the data. RS, MB, AHefetz and  
440 VS wrote the manuscript. All authors agreed to the final version of publication and its  
441 content.

## 442 Acknowledgments

443 We wish to thank the beekeeper Ilia Zaidman for technical assistance with colonies,  
444 Dr. Hillary Voet for her help with statistical analysis, Dr. Beatrice Nganso for her  
445 critical review on the draft of this manuscript and BARD Binational Foundation grant  
446 IS-5078-18 to VS for funding final stages of this research.

## 447 References

- 448 Arathi HS, Spivak M (2001) Influence of colony genotypic composition on the  
449 performance of hygienic behaviour in the honeybee, *L. Anim Behav* 62:57–66.  
450 doi: 10.1006/anbe.2000.1731
- 451 Bigio G, Al Toufailia H, Hughes WOH, Ratnieks FLW (2014a) The effect of one  
452 generation of controlled mating on the expression of hygienic behaviour in  
453 honey bees. *J Apic Res* 53:563–568. doi: 10.3896/IBRA.1.53.5.07
- 454 Bigio G, Al Toufailia H, Ratnieks FLW (2014b) Honey bee hygienic behaviour does  
455 not incur a cost via removal of healthy brood. *J Evol Biol* 27:226–230. doi:  
456 10.1111/jeb.12288
- 457 Bigio G, Schürch R, Ratnieks FLW (2013) Hygienic Behavior in Honey Bees  
458 (Hymenoptera: Apidae): Effects of Brood, Food, and Time of the Year. *J Econ*  
459 *Entomol* 106:2280–2285
- 460 Boecking O, Bienefeld K, Dreschner W (2000) Heritability of the *Varroa*-specific  
461 hygienic behaviour in honey bees (Hymenoptera: Apidae). *J Anim Breed Genet*  
462 117:417–424. doi: 10.1046/j.1439-0388.2000.00271.x
- 463 Büchler R, Andonov S, Bienefeld K, et al (2013) Standard methods for rearing and  
464 selection of *Apis mellifera* queens. *J Apic Res* 52:1–30. doi:  
465 10.3896/IBRA.1.52.1.07
- 466 Büchler R, Berg S, Le Conte Y, et al (2010) Breeding for resistance to *Varroa*  
467 *destructor* in Europe. *Apidologie* 41:393–408. doi: 10.1051/apido/2010011
- 468 Büchler R, Costa C, Hatjina F, et al (2014) The influence of genetic origin and its  
469 interaction with environmental effects on the survival of *Apis mellifera* L.  
470 colonies in Europ. *J Apic Res* 53:205–214. doi: 10.3896/IBRA.1.53.2.03
- 471 Costa C, Büchler R, Berg S, et al (2012) A europe-wide experiment for assessing the  
472 impact of genotype-environment interactions on the vitality and performance of  
473 honey bee colonies: experimental design and trait evaluation. *J Apic Sci* 56:147–  
474 158. doi: 10.2478/v10289-012-0015-9
- 475 Danka RG, Harris JW, Dodds GE (2016) Selection of VSH-derived “Pol-line” honey  
476 bees and evaluation of their *Varroa*-resistance characteristics. *Apidologie*  
477 47:483–490. doi: 10.1007/s13592-015-0413-7
- 478 de Jesus JN, Chambó ED, da Silva Sodré G, et al (2017) Hygienic behavior in  
479 *Melipona quadrifasciata anthidioides* (Apidae, Meliponini). *Apidologie* 48:504–  
480 512. doi: 10.1007/s13592-017-0495-5
- 481 Delaplane and Mayer (2000) Crop pollination by bees. *Design* 99:127–129. doi:  
482 10.1046/j.1570-7458.2001.00810.x
- 483 Dietemann V, Nazzi F, Martin SJ, et al (2013) Standard methods for varroa research.

- 484 J Apic Res 52:. doi: 10.3896/IBRA.1.52.1.09  
485 Dietemann V, Pflugfelder J, Anderson D, et al (2012) *Varroa destructor*: research  
486 avenues towards sustainable control. J Apic Res 51:125–132. doi:  
487 10.3896/IBRA.1.51.1.15  
488 Doke MA, Frazier M, Grozinger CM (2015) Overwintering honey bees: biology and  
489 management. Curr Opin Insect Sci 10:185–193. doi: 10.1016/j.cois.2015.05.014  
490 Dolezal AG, Carrillo-Tripp J, Miller WA, et al (2016) Intensively cultivated  
491 landscape and varroa mite infestation are associated with reduced honey bee  
492 nutritional state. PLoS One 11:1–13. doi: 10.1371/journal.pone.0153531  
493 Evans JD, Spivak M (2010) Socialized medicine: Individual and communal disease  
494 barriers in honey bees. J Invertebr Pathol 103:S62–S72. doi:  
495 10.1016/j.jip.2009.06.019  
496 Fly MF, Capitata C, Khlaywi SA, et al (2014) Hygienic behavioural mechanism of  
497 resistance to diseases and parasites in west african honey bee colonies *Apis*  
498 *mellifera* adansonii (Hymenoptera: apidae) aakinwande. Int J Entomol Res  
499 02:169–173  
500 Francis RM, Nielsen SL, Kryger P (2013) Varroa-Virus Interaction in Collapsing  
501 Honey Bee Colonies. PLoS One 8:. doi: 10.1371/journal.pone.0057540  
502 Geffre AC, Gernat T, Harwood GP, et al (2020) Honey bee virus causes context-  
503 dependent changes in host social behavior. Proc Natl Acad Sci 117:1–8. doi:  
504 10.1073/pnas.2002268117  
505 Gempe T, Stach S, Bienefeld K, et al (2016) Behavioral and molecular studies of  
506 quantitative differences in hygienic behavior in honeybees. BMC Res Notes 1–8.  
507 doi: 10.1186/s13104-016-2269-y  
508 Genersch E, Von Der Ohe W, Kaatz H, et al (2010) The German bee monitoring  
509 project: A long term study to understand periodically high winter losses of honey  
510 bee colonies. Apidologie 41:332–352. doi: 10.1051/apido/2010014  
511 Gregory PG, Evans JD, Rinderer T, de Guzman L (2005) Conditional immune-gene  
512 suppression of honeybees parasitized by varroa mites. J Insect Sci 5:1–5. doi:  
513 10.1673/031.005.0701  
514 Guarna M, Melathopoulos AP, Huxter E, et al (2015) A search for protein biomarkers  
515 links olfactory signal transduction to social immunity. BMC Genomics 16:63.  
516 doi: 10.1186/s12864-014-1193-6  
517 Güler A, Toy H (2013) Relationship between dead pupa removal and season and  
518 productivity of honey bee (*Apis mellifera*, Hymenoptera: Apidae) colonies.  
519 Turkish J Vet Anim Sci 37:462–467. doi: 10.3906/vet-1205-48  
520 Klein A-M, Vaissiere BE, Cane JH, et al (2007) Importance of pollinators in changing  
521 landscapes for world crops. Proc R Soc B Biol Sci 274:303–313. doi:  
522 10.1098/rspb.2006.3721  
523 Kuster RD, Boncristiani HF, Rueppell O (2014) Immunogene and viral transcript  
524 dynamics during parasitic *Varroa destructor* mite infection of developing honey  
525 bee (*Apis mellifera*) pupae. J Exp Biol 217:1710–1718. doi: 10.1242/jeb.097766  
526 Le Conte Y, Alaux C, Martin JF, et al (2011) Social immunity in honeybees (*Apis*  
527 *mellifera*): Transcriptome analysis of varroa-hygienic behaviour. Insect Mol Biol  
528 20:399–408. doi: 10.1111/j.1365-2583.2011.01074.x  
529 Le Conte Y, Meixner MD, Brandt A., et al (2020) Geographical distribution and  
530 selection of European honey bees resistant to *Varroa destructor*. Insects, 11  
531 doi: 10.3390/insects11120873  
532 Leclercq G, Pannebakker B, Gengler N, et al (2017) Drawbacks and benefits of  
533 hygienic behavior in honey bees (*Apis mellifera* L.): a review. J. Apic. Res.

- 534 56:366–375
- 535 Locke B (2016) Natural varroa mite-surviving *Apis mellifera* honeybee populations.
- 536 *Apidologie* 47:467–482. doi: 10.1007/s13592-015-0412-8
- 537 Locke B (2012) Host-parasite adaptations and interactions between honey bees,
- 538 varroa mites and viruses
- 539 Meixner MD, Büchler R, Costa C, et al (2014) Honey bee genotypes and the
- 540 environment. *J Apic Res* 53:183–187. doi: 10.3896/IBRA.1.53.2.01
- 541 Mondet F, de Miranda JR, Kretzschmar A, et al (2014) On the front line: quantitative
- 542 virus dynamics in honeybee (*Apis mellifera* L.) colonies along a new expansion
- 543 front of the parasite *Varroa destructor*. *PLoS Pathog* 10:e1004323. doi:
- 544 10.1371/journal.ppat.1004323
- 545 Mondet F, Kim SH, de Miranda JR, et al (2016) Specific cues associated with honey
- 546 bee social defence against *Varroa destructor* infested brood. *Sci Rep* 6:25444.
- 547 doi: 10.1038/srep25444
- 548 Mullin CA, Frazier M, Frazier JL, et al (2010) High levels of miticides and
- 549 Agrochemicals in North American Apiaries: Implications for Honey Bee Health.
- 550 *PLoS One* 5:e9754. doi: 10.1371/journal.pone.0009754
- 551 Niño EL, Cameron Jasper W (2015) Improving the future of honey bee breeding
- 552 programs by employing recent scientific advances. *Curr Opin Insect Sci* 10:163–
- 553 169. doi: 10.1016/j.cois.2015.05.005
- 554 Oxley PR, Oldroyd BP (2010) The genetic architecture of honeybee breeding.
- 555 *Advances in Insect Physiology* 39:83-118. DOI: 10.1016/B978-0-12-381387-
- 556 9.00003-8
- 557
- 558 Plate M, Bernstein R, Hoppe A, Bienefeld K (2019) The importance of controlled
- 559 mating in honeybee breeding. *Genet Sel Evol* 51:74. doi: 10.1186/s12711-019-
- 560 0518-y
- 561 Plettner E, Eliash N, Singh NK, et al (2016) The chemical ecology of host-parasite
- 562 interaction as a target of *Varroa destructor* control agents. *Apidologie* 48:78–92.
- 563 doi: 10.1007/s13592-016-0452-8
- 564 Ramsey SD, Ochoa R, Bauchan G, et al (2019) *Varroa destructor* feeds primarily on
- 565 honey bee fat body tissue and not hemolymph. *Proc Natl Acad Sci U S A*
- 566 116:1792–1801. doi: 10.1073/pnas.1818371116
- 567 Rosenkranz P, Aumeier P, Ziegelmann B (2010) Biology and control of *Varroa*
- 568 *destructor*. *J Invertebr Pathol* 103:S96–S119. doi: 10.1016/j.jip.2009.07.016
- 569 Ryabov E V., Wood GR, Fannon JM, et al (2014) A Virulent Strain of Deformed
- 570 Wing Virus (DWV) of Honeybees (*Apis mellifera*) Prevails after *Varroa*
- 571 *destructor*-mediated, or *in vitro*, transmission. *PLoS Pathog* 10:e1004230. doi:
- 572 10.1371/journal.ppat.1004230
- 573 Sammataro D, Avitabile A (2011) *The beekeeper's handbook*, 4th ed. Comstock Pub.
- 574 Associates, Ithaca
- 575 Sammataro D, Untalan P, Guerrero F, Finley J (2005) The resistance of varroa mites
- 576 (Acari: Varroidae) to acaricides and the presence of esterase. *Int J Acarol* 31:67–
- 577 74. doi: 10.1080/01647950508684419
- 578 Scannapieco AC, Mannino MC, Soto G, et al (2017) Expression analysis of genes
- 579 putatively associated with hygienic behavior in selected stocks of *Apis mellifera*
- 580 L. from Argentina. *Insectes Soc* 64:485–494. doi: 10.1007/s00040-017-0567-6
- 581 Seeley TD (1985) *Honeybee Ecology*. Princeton University Press, Princeton, New
- 582 Jersey
- 583 Simon-Delso N, Martin GS, Bruneau E, et al (2014) Honeybee Colony Disorder in



- 584 Crop Areas: The Role of Pesticides and Viruses. PLoS One 9:e103073. doi:  
585 10.1371/journal.pone.0103073
- 586 Soroker V, Slobezki Y, Chejanovsky N (2018) Apiculture in Israel. Asian Beekeeping  
587 in 21st Century 95–109. doi: 10.1007/978-981-10-8222-1\_4
- 588 Soroker V, Singh, KN, Eliash, N, Plettner, E. (2019) Olfaction as a target for control  
589 of honeybee parasitic mite *Varroa destructor*. Ch. 6 in: Olfactory concepts of  
590 pest control. J-F. Picimbon ed. Springer (2019).
- 591 Spivak M, Danka RG (2021) Perspectives on hygienic behavior in *Apis mellifera* and  
592 other social insects. Apidologie 52:1–16. doi: 10.1007/s13592-020-00784-z
- 593 Spivak M, Gilliam M (1998) Hygienic behaviour of honey bees and its application for  
594 control of brood diseases and varroa. Bee World 79:169–186. doi:  
595 10.1080/0005772X.1998.11099394
- 596 Spivak M, R.Euter GS (2001) Resistance to American foulbrood disease by honey  
597 bee colonies *Apis mellifera* bred for hygienic behavior. Apidologie 32:555–565.  
598 doi: 10.1051/apido:2001103
- 599 Spivak M, Reuter GS (1998) Performance of hygienic honey bee colonies in a  
600 commercial apiary. Apidologie 29:291–302. doi: 10.1051/apido
- 601 Steinhauer, N, Kulhanek K., K, Antúñez, et al (2018) Drivers of colony losses,  
602 Current Opinion in Insect Science26: 142-148,  
603 /doi:10.1016/j.cois.2018.02.004.Thomas E. Rinderer, Lilia I. de Guzman, G.T.  
604 Delatte, et al (2001) Resistance to the parasitic mite *Varroa destructor* in honey  
605 bees from far-eastern Russia. Apidologie 32:381–394. doi:  
606 10.1051/apido:2001138
- 607 Uzunov A, Brascamp EW, Büchler R (2017) The basic concept of honey bee breeding  
608 programs. Bee World 94:84–87. doi: 10.1080/0005772x.2017.1345427
- 609 Uzunov A, Cost C, Panasiuk B, et al (2014) Swarming , defensive and hygienic  
610 behaviour in honey bee colonies of different genetic origin in a pan-European  
611 experiment. J Apic Res 53:248–260. doi: 10.3896/IBRA.1.53.2.06
- 612 VanEngelsdorp D, Meixner MD (2010) A historical review of managed honey bee  
613 populations in Europe and the United States and the factors that may affect them.  
614 J Invertebr Pathol 103:S80–S95. doi: 10.1016/j.jip.2009.06.011
- 615 Yang X, Cox-Foster DL (2005) Impact of an ectoparasite on the immunity and  
616 pathology of an invertebrate: evidence for host immunosuppression and viral  
617 amplification. Proc Natl Acad Sci U S A 102:7470–7475. doi:  
618 10.1073/pnas.0501860102
- 619 Zakar E, Javor A, Kusza S (2014) Genetic bases of tolerance to *Varroa destructor* in  
620 honey bees (*Apis mellifera* L.). Insectes Soc 61:207–215. doi: 10.1007/s00040-  
621 014-0347-5
- 622 Zakour MK, Bienefeld K (2014) Basic considerations in the development of breeding  
623 plans for honey bees, illustrated by data on the native Syrian honey bee (*Apis*  
624 *mellifera syriaca*). doi: 10.3896/IBRA.1.53.2.13
- 625 Zanni V, Galbraith DA, Annoscia D, et al (2017) Transcriptional signatures of  
626 parasitization and markers of colony decline in Varroa-infested honey bees (*Apis*  
627 *mellifera*). Insect Biochem Mol Biol 87:1–13. doi: 10.1016/j.ibmb.2017.06.002
- 628 Zioni N, Soroker V, Chejanovsky N (2011) Replication of *Varroa destructor* virus 1  
629 (VDV-1) and a *Varroa destructor* virus 1-deformed wing virus recombinant  
630 (VDV-1-DWV) in the head of the honey bee. Virology 417:106–112. doi:  
631 10.1016/j.virol.2011.05.009  
632
